# Supplementary material for: Development of Mia Phenotyping Using Paper-Based Device
Source: MDPI journal article supplement (doi:10.3390/diagnostics12123104), 2022-12-09

**Figure S1. (A)** Pixel intensity of different blood volumes (1, 2.5, and 5  $\mu$ L) tested with paper-based device. RBC agglutination means positive result (left), while no RBC bound to antibody (non-agglutination) indicates negative result (right); (B) Reaction time between RBC and anti-Mi<sup>a</sup>.

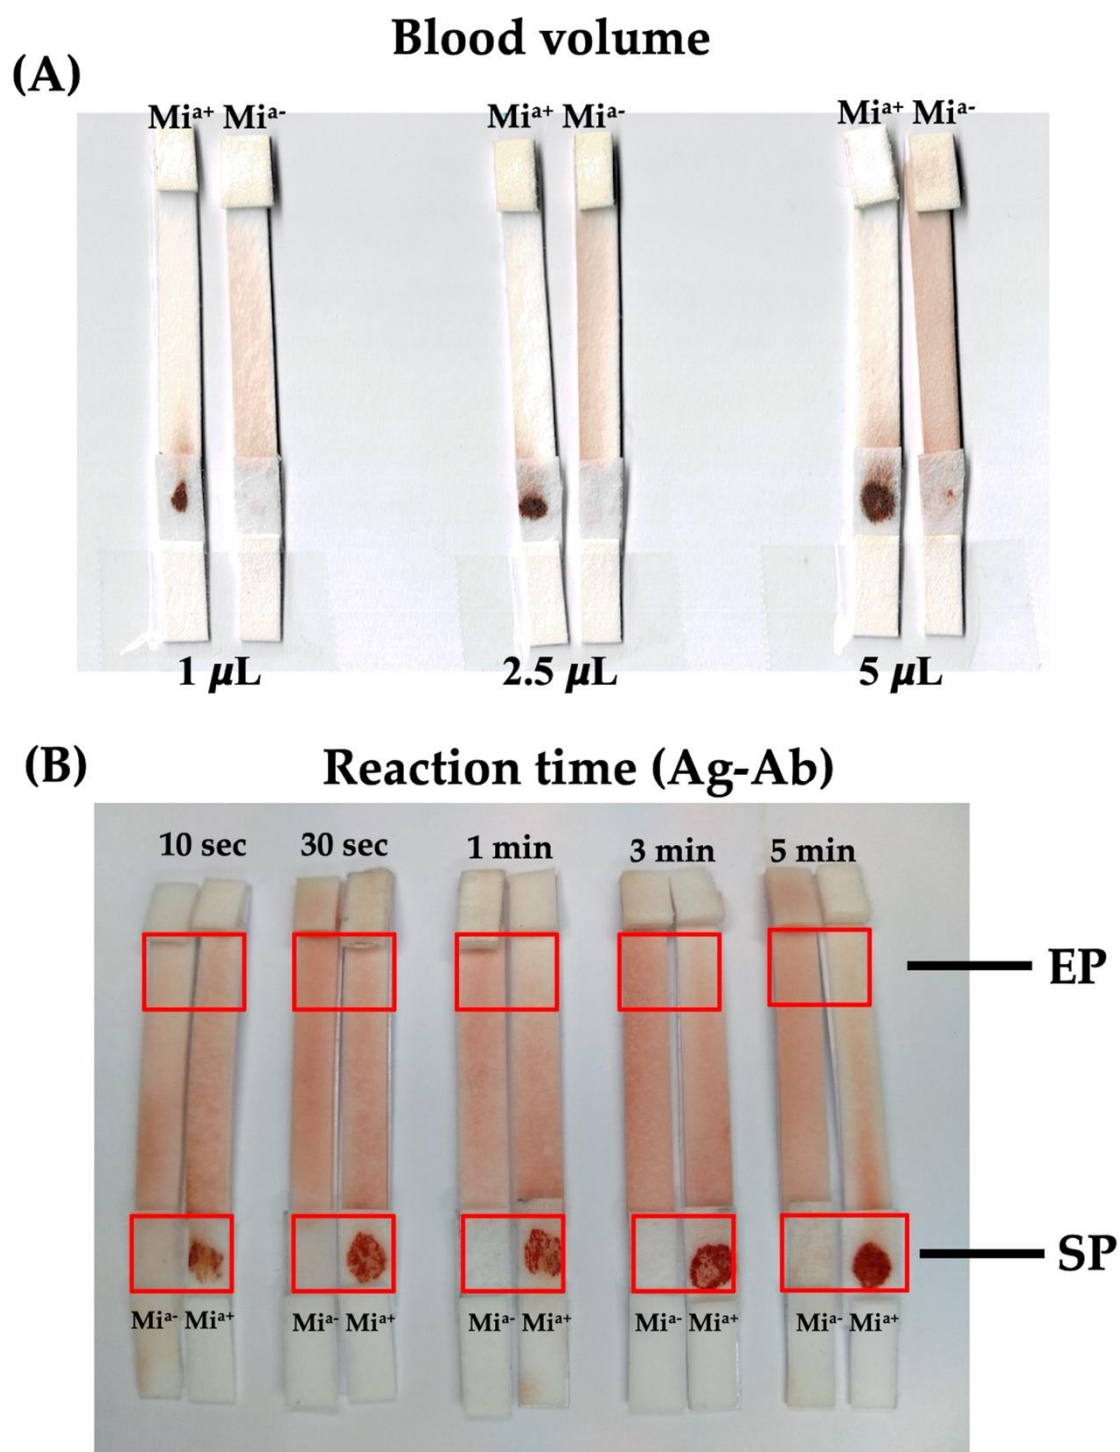

Figure S2. Mi<sup>a</sup> blood typing results (samples 001–030).

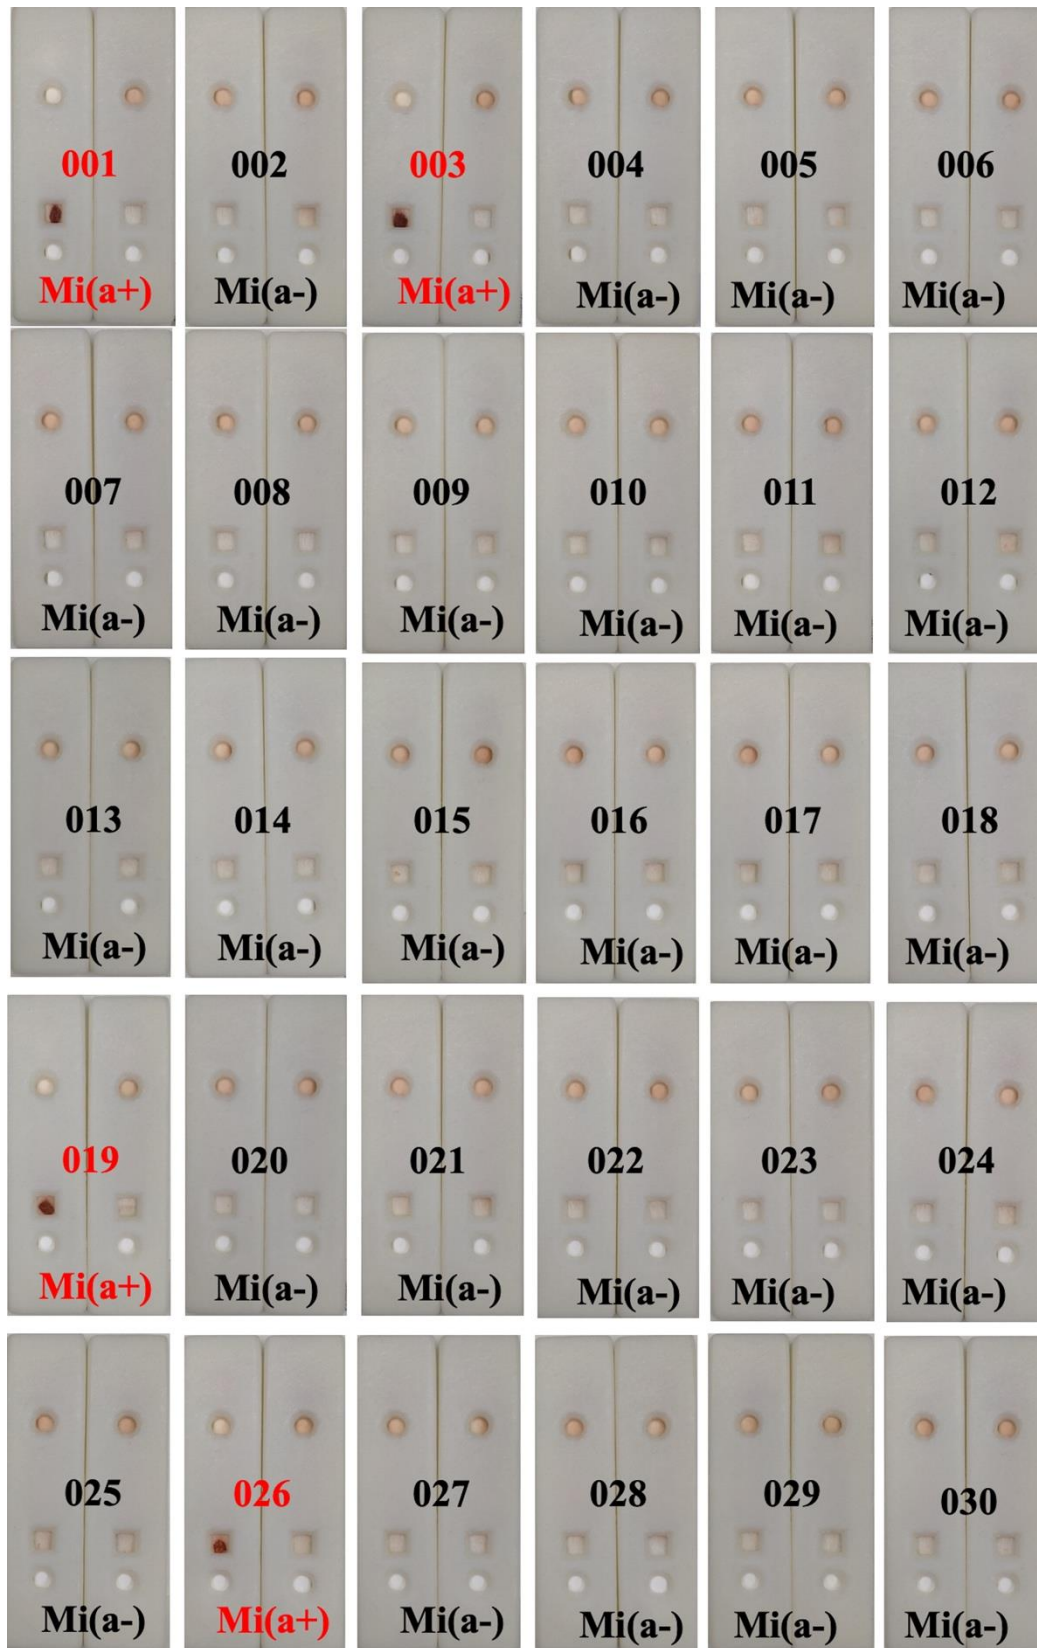

Figure S3. Mi<sup>a</sup> blood typing results (samples 031–060).

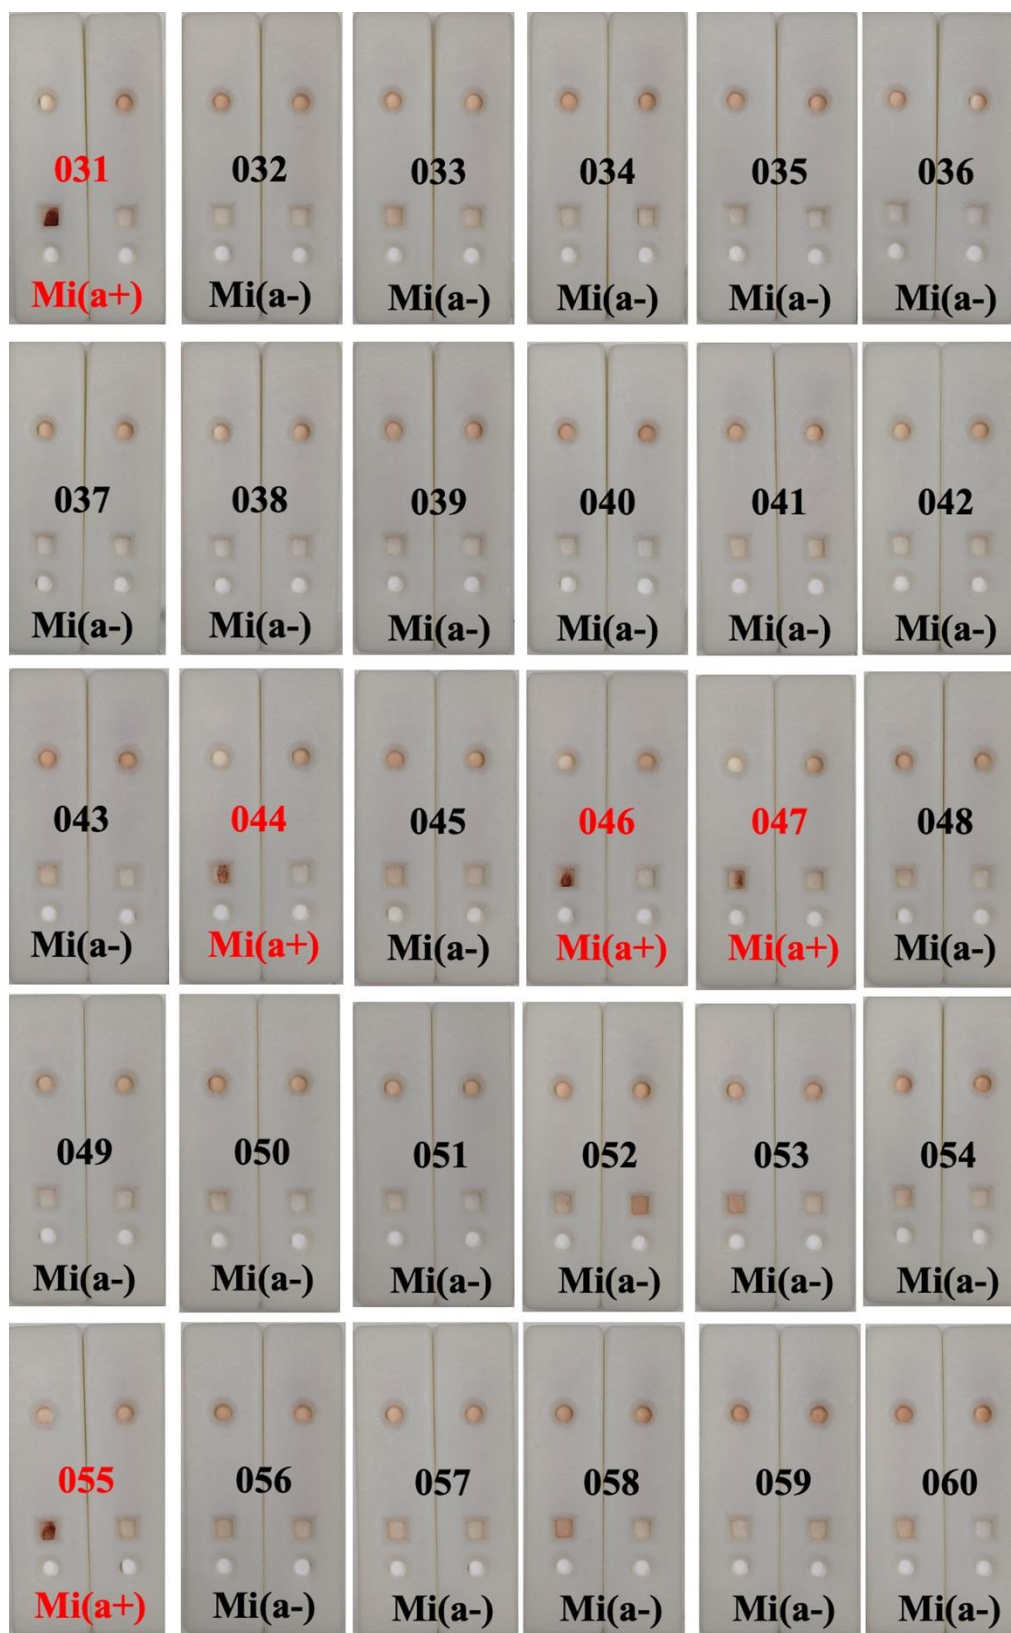



Figure S4. Mi<sup>a</sup> blood typing results (samples 061–090).

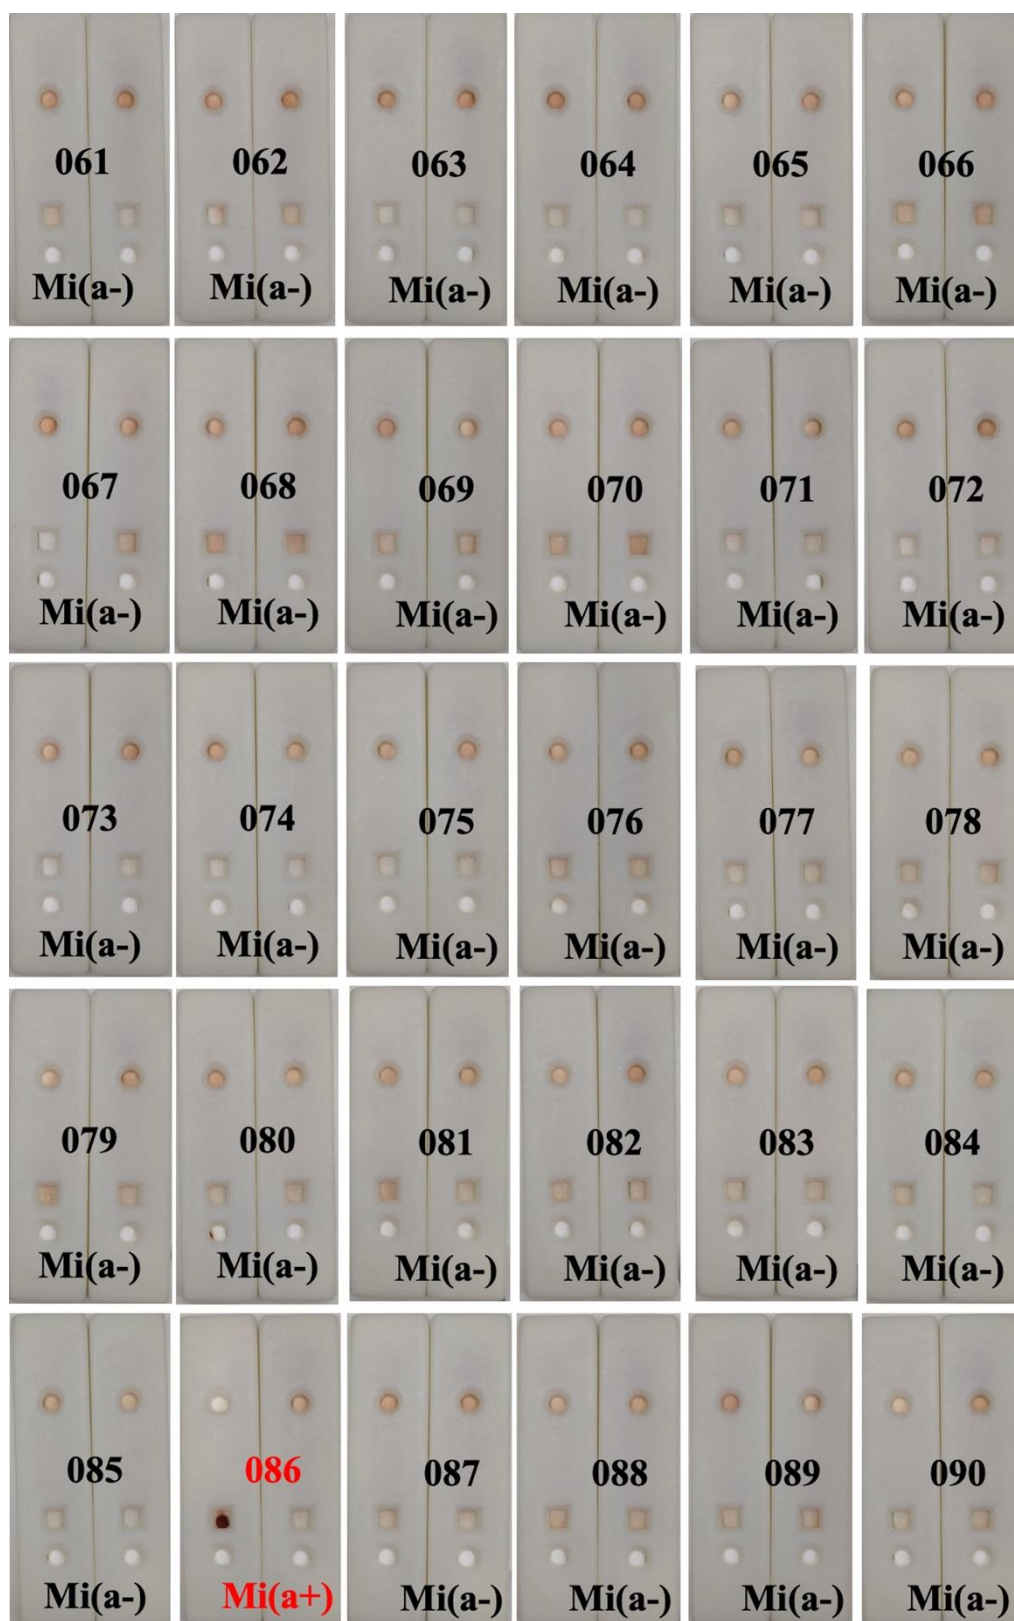

Figure S5. Mi<sup>a</sup> blood typing results (samples 091–120).

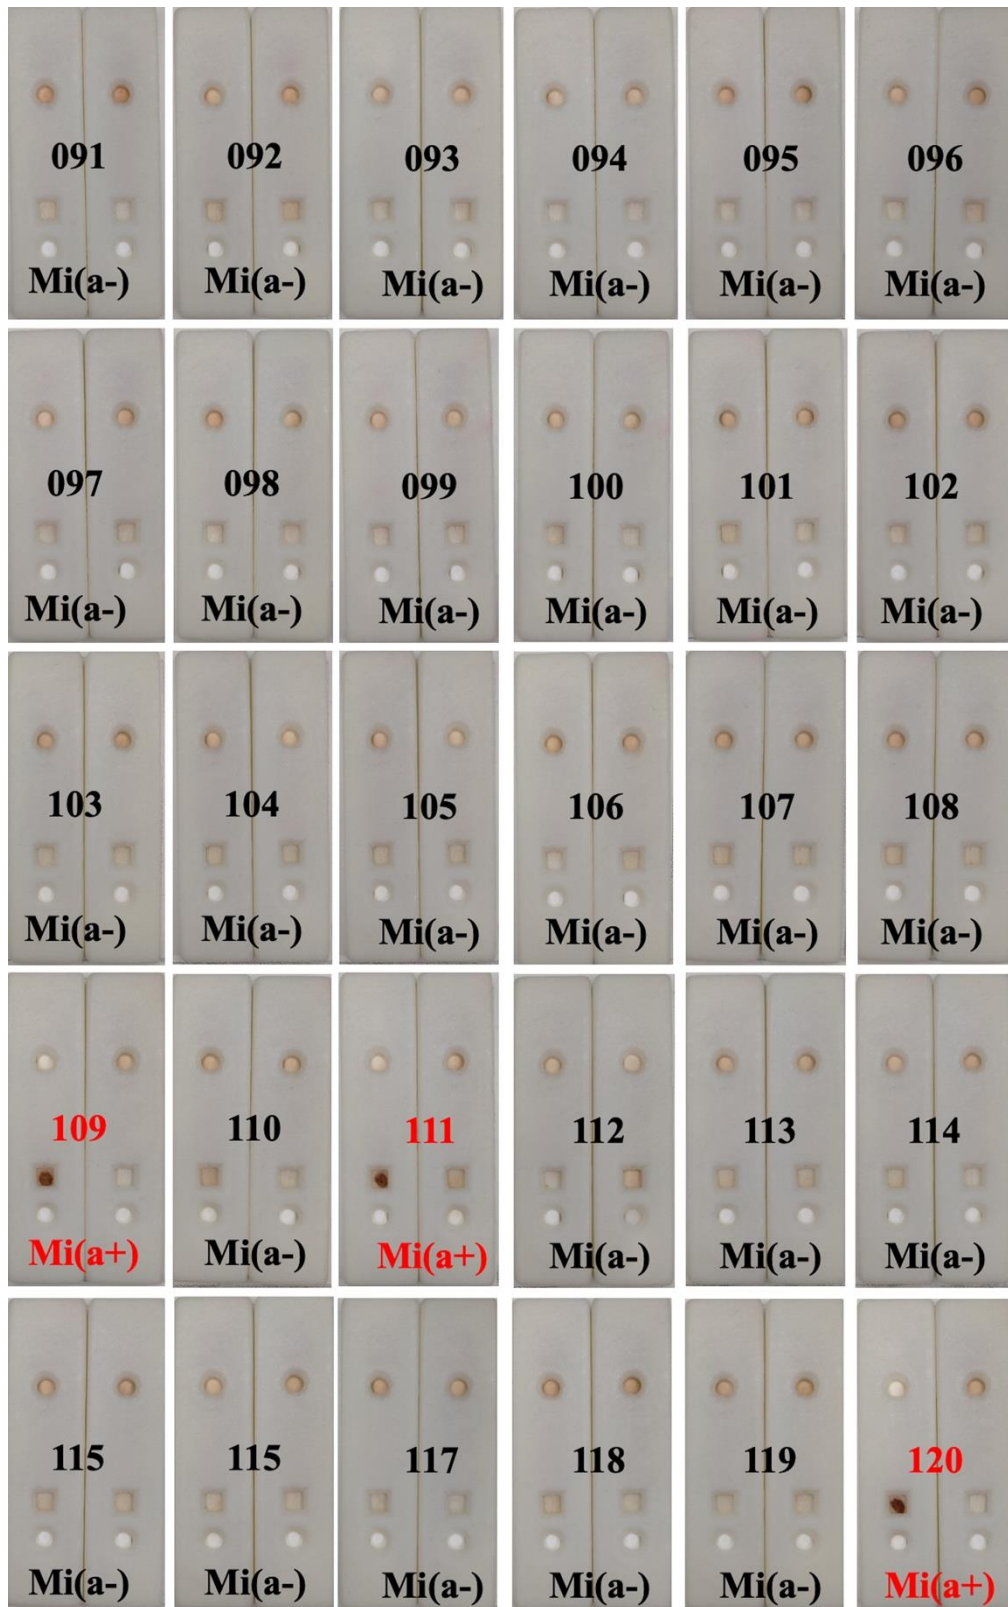

Figure S6. Mi<sup>a</sup> blood typing results (samples 121–150).

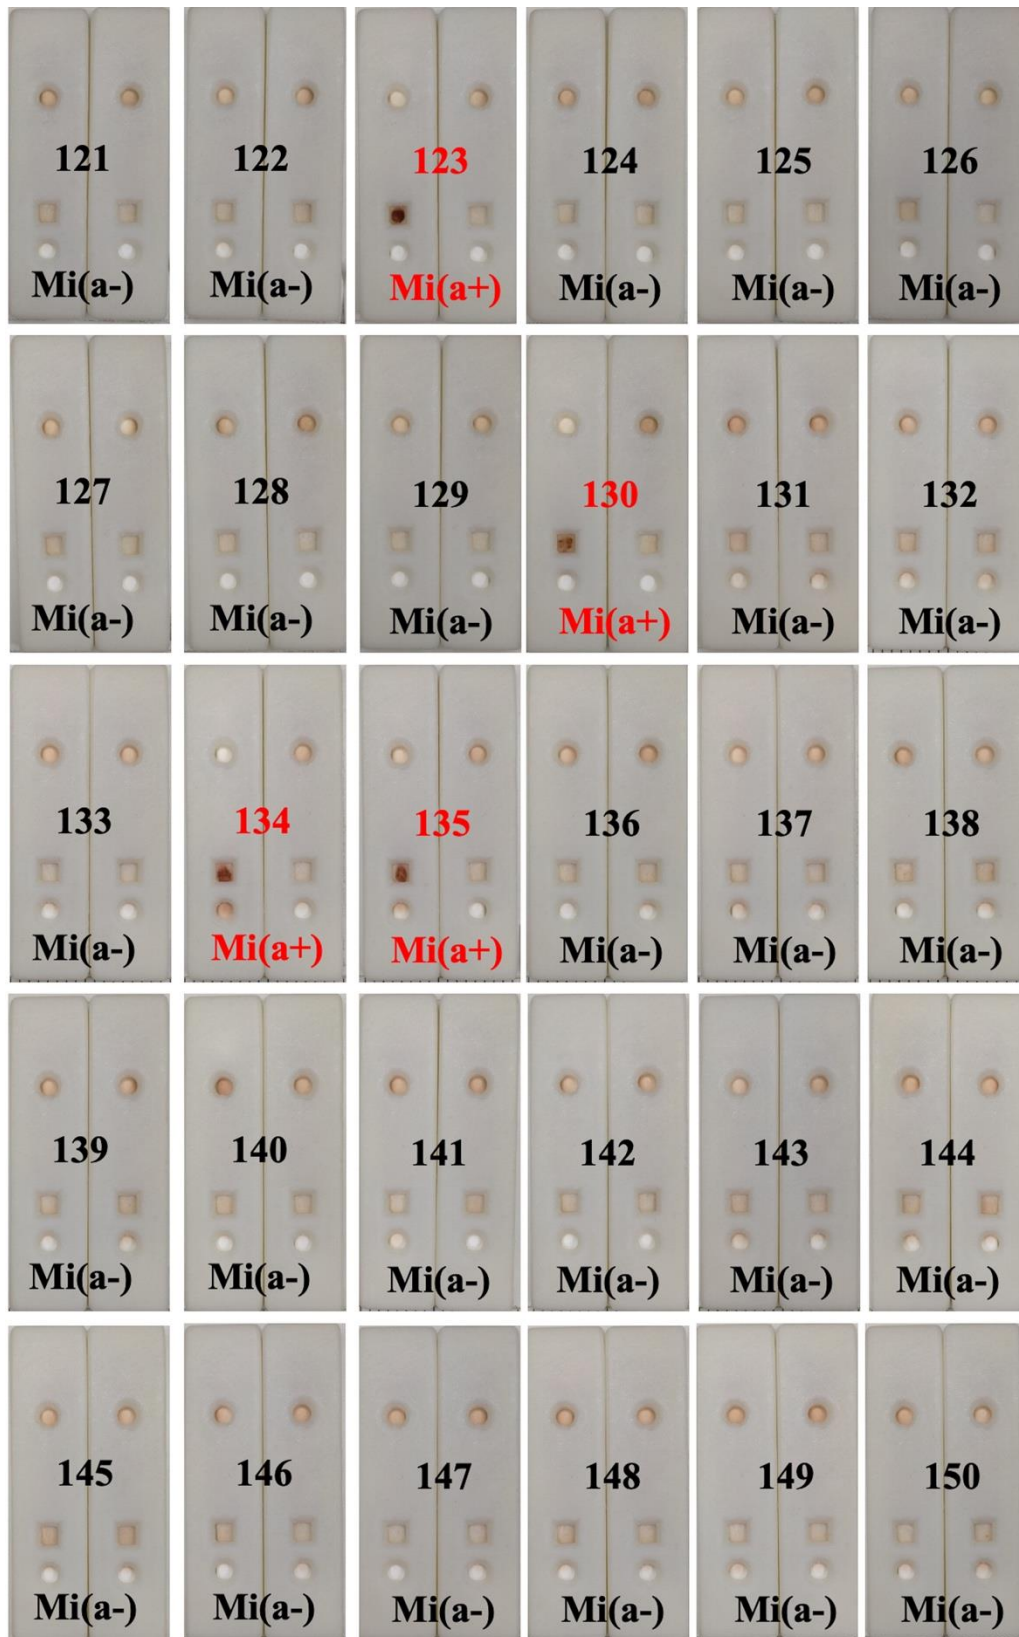



Figure S7. Mi<sup>a</sup> blood typing results (samples 151–174).

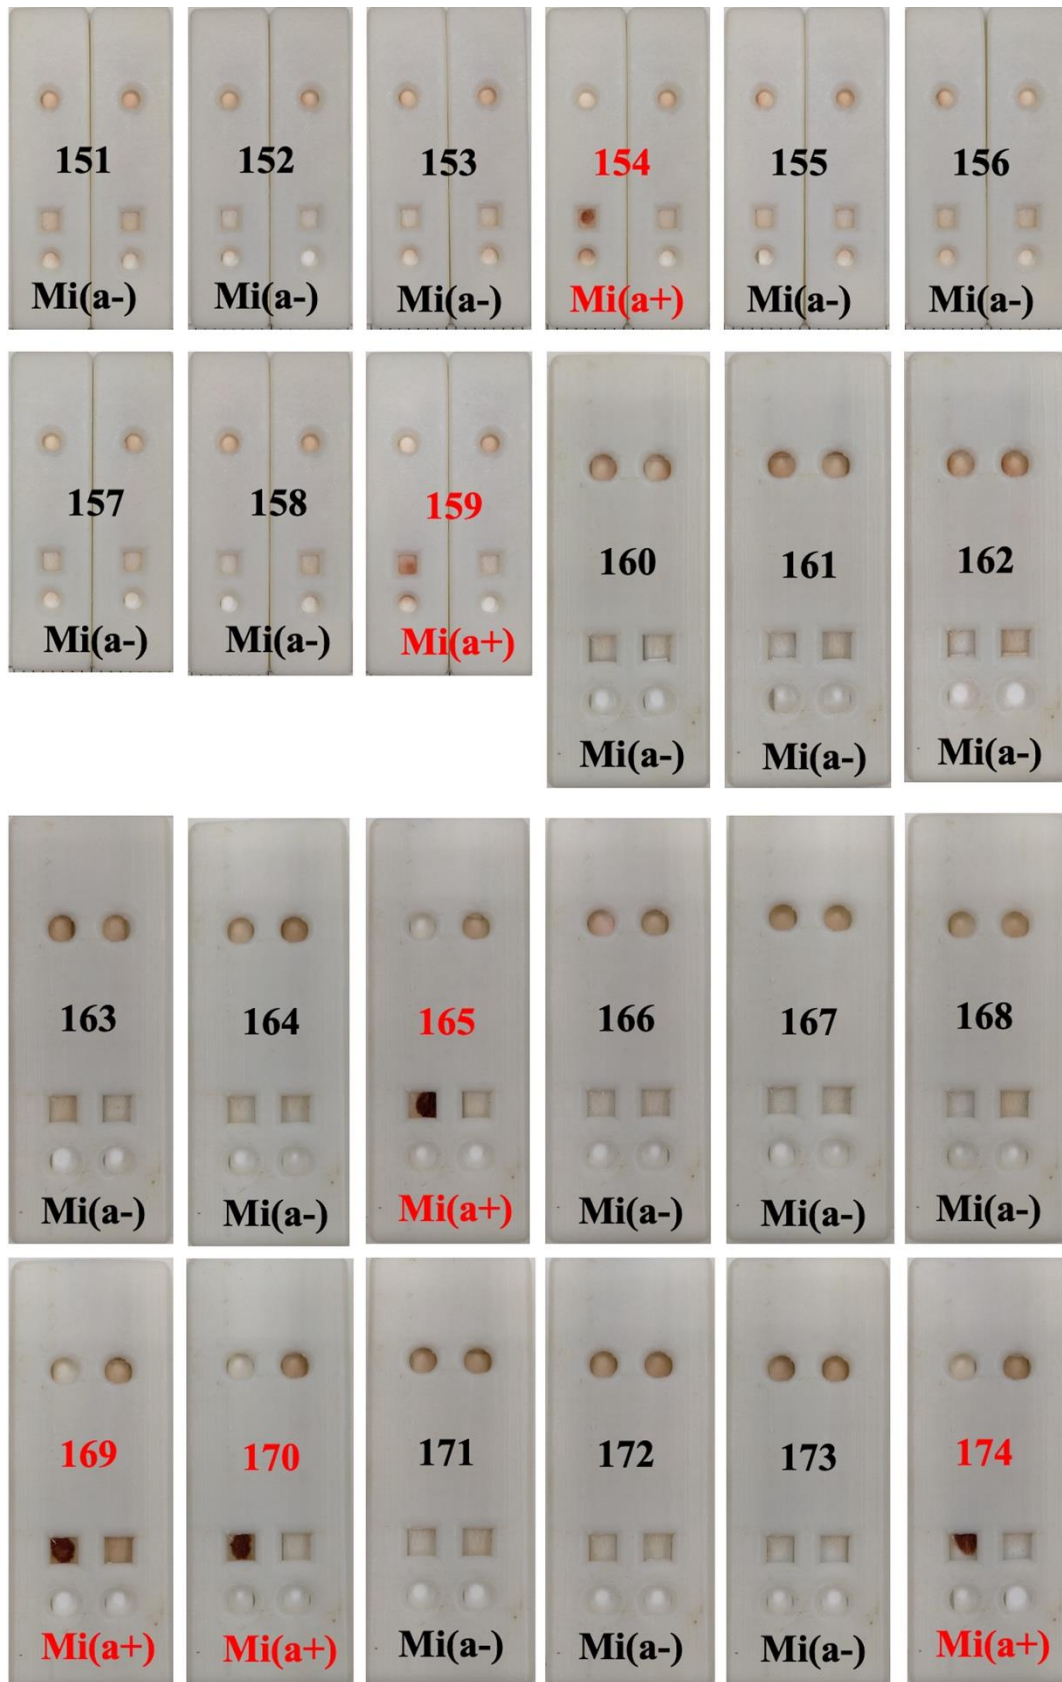

Figure S8. Mi<sup>a</sup> blood typing results (samples 175–192).

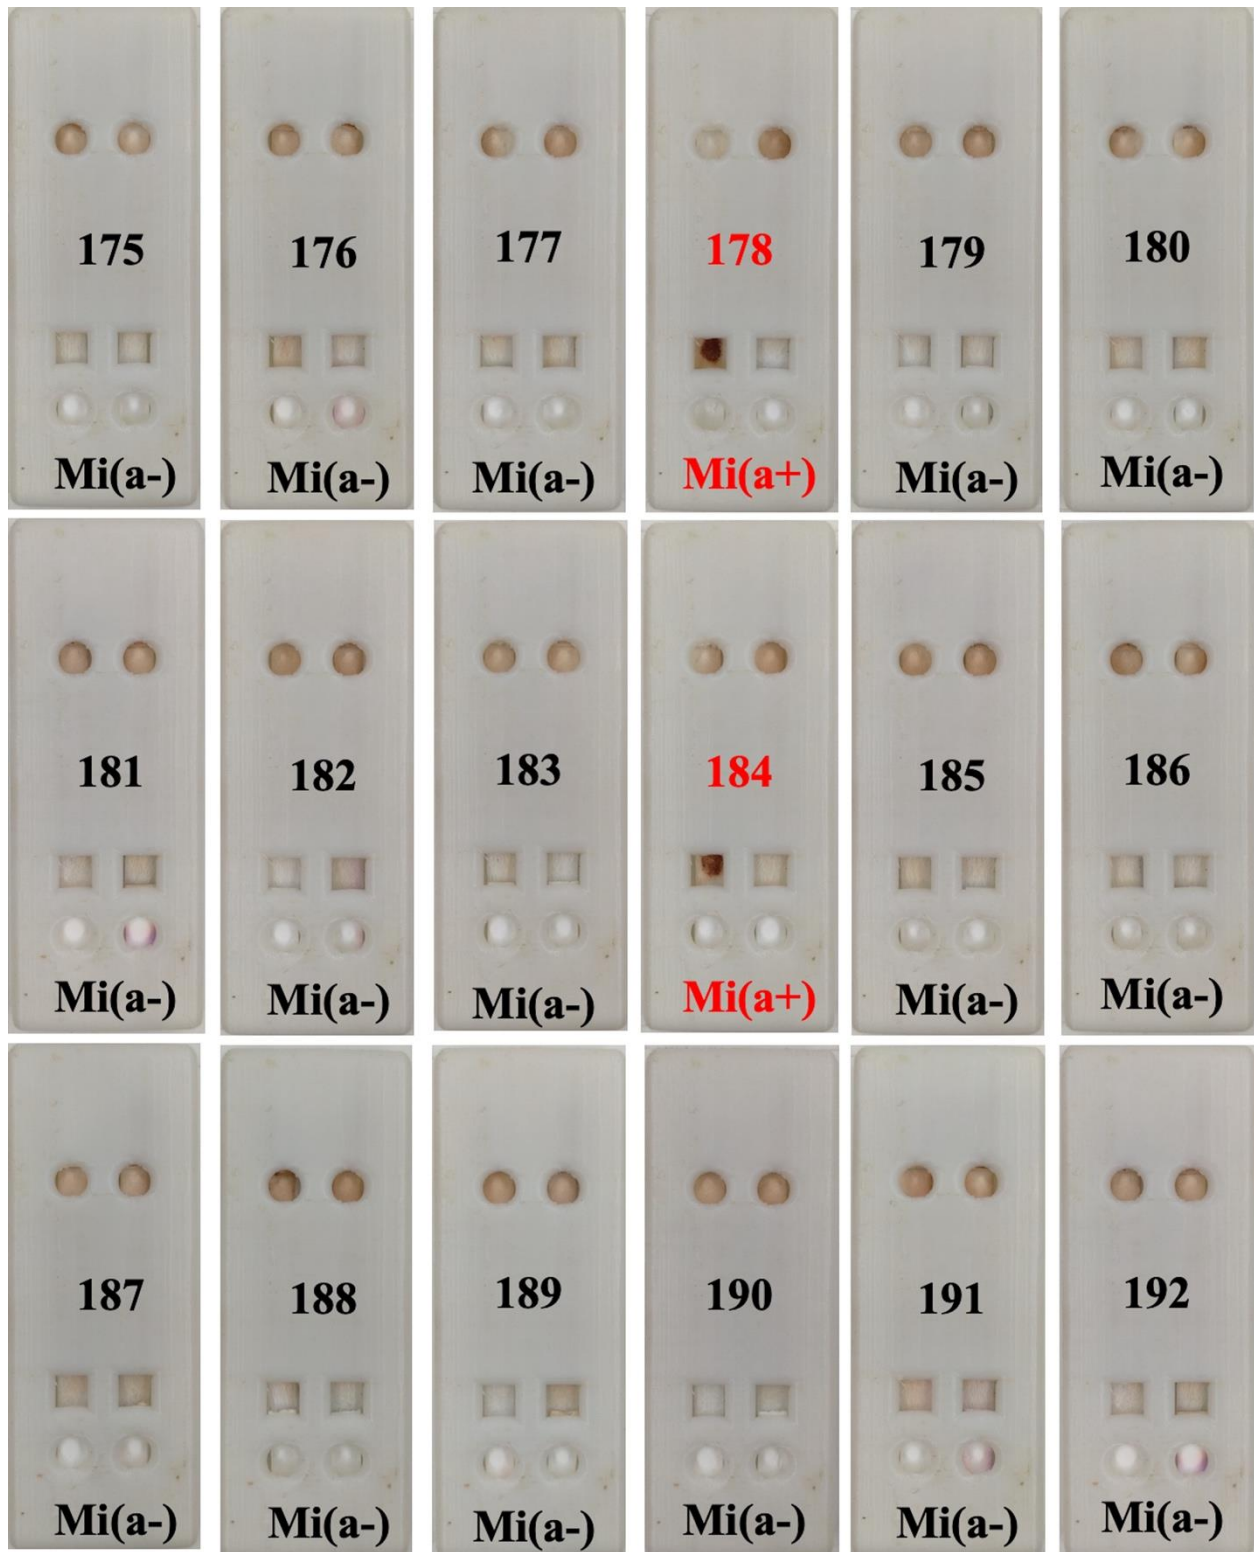



Figure S9. Mi<sup>a</sup> blood typing results (samples 193–210).

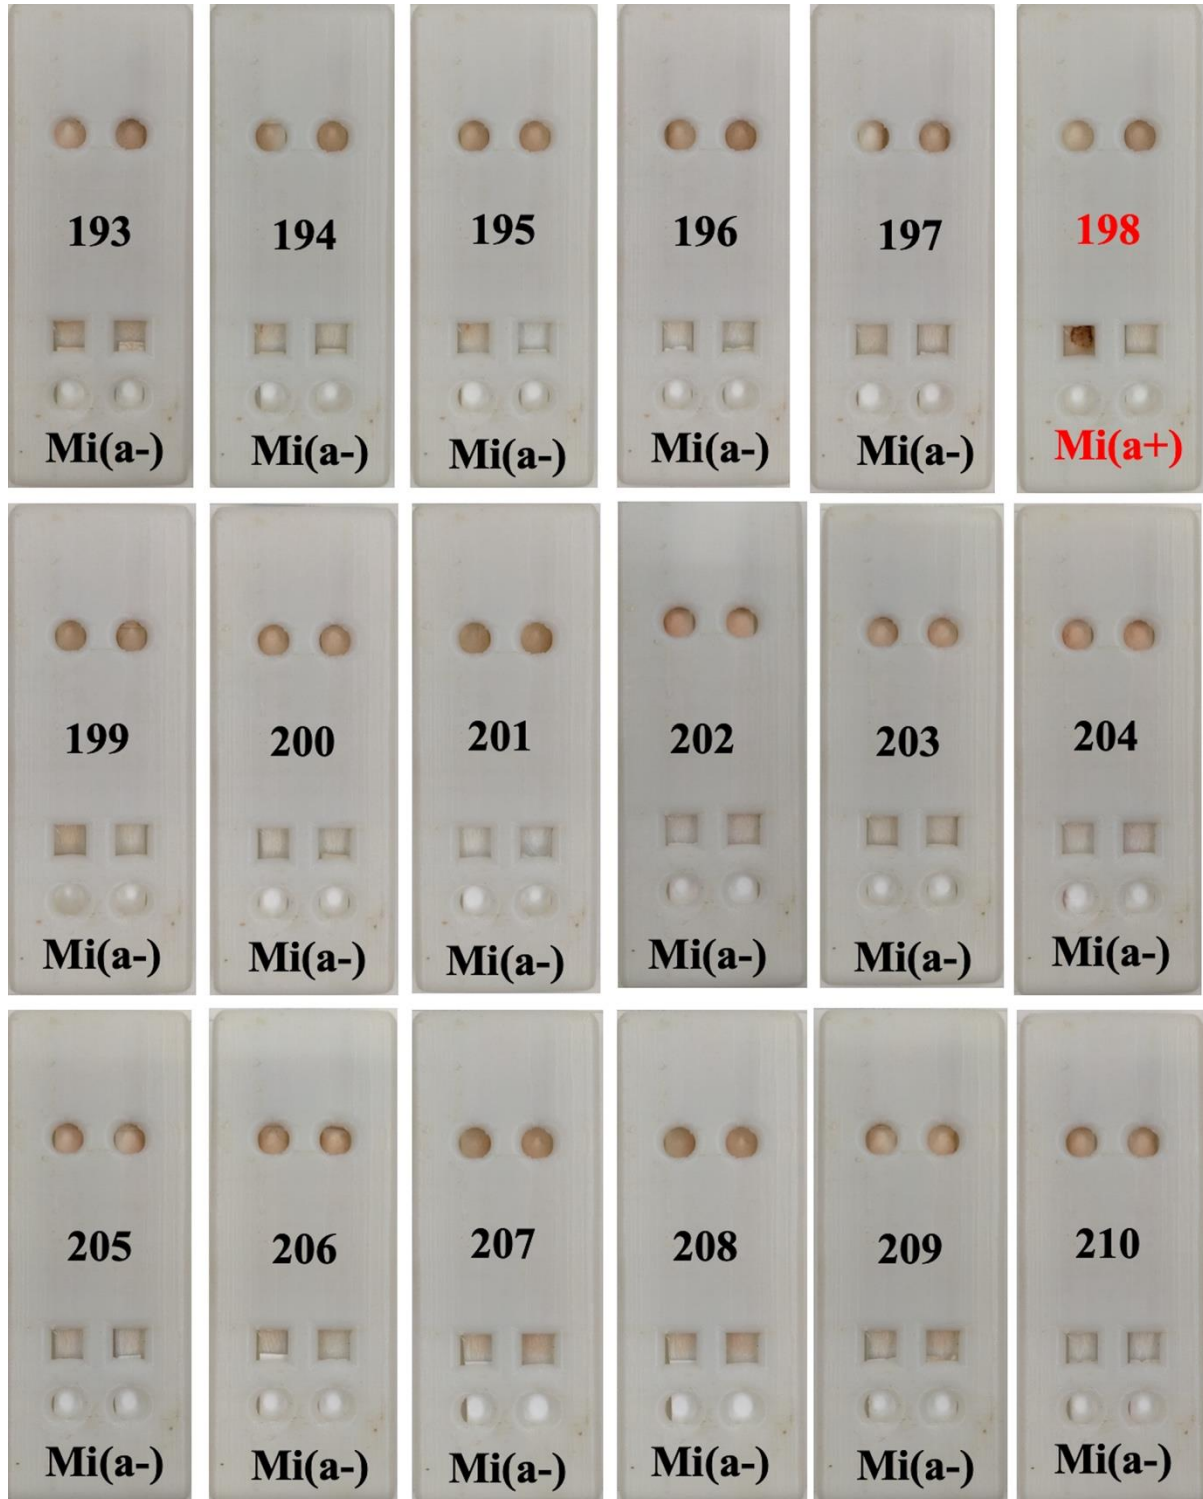

Figure S10. Mi<sup>a</sup> blood typing results (samples 211–214).

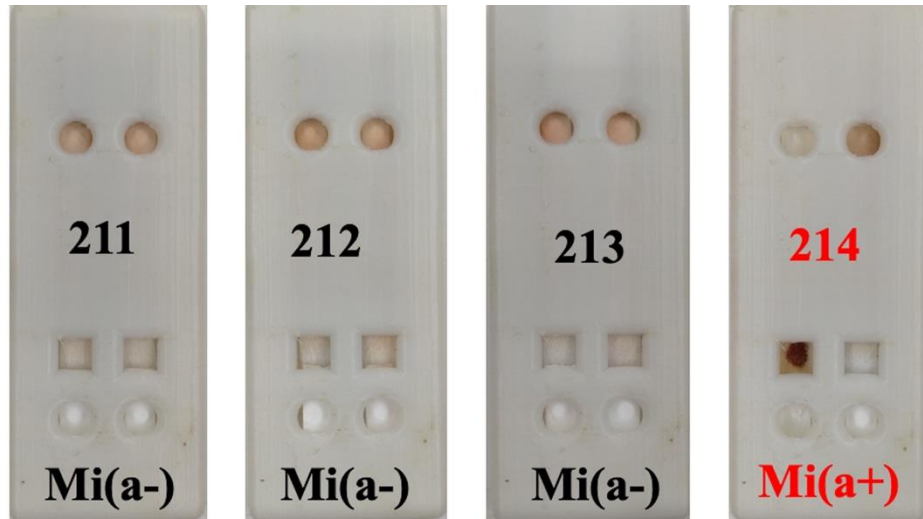

Supplement: s1 [file s1]
